1 **The impact of residency training in family medicine on hospital**  
2 **admissions due to Ambulatory-care Sensitive Conditions in Rio de**  
3 **Janeiro**

4

5

6

7 **Authors:**

8 Adelson Guaraci Jantsch<sup>1</sup>, Bo Burström<sup>2</sup>, Gunnar Nilsson<sup>3</sup>, Antônio Ponce de Leon<sup>1,2</sup>

9

10 <sup>1</sup>Instituto de Medicina Social, Rio de Janeiro State University, Bloco D e E, R. São Francisco  
11 Xavier, 524 – 7<sup>th</sup> floor - Maracanã, Rio de Janeiro - RJ, 20550-900

12 <sup>2</sup>Department of Global Public Health at the Karolinska Institute

13 <sup>3</sup>Department of Neurobiology, Care Sciences and Society at the Karolinska Institute

14

15

16

17 **Corresponding author:**

18 Gunnar Nilsson. Email: [gunnar.nilsson@ki.se](mailto:gunnar.nilsson@ki.se)

19

20 **ABSTRACT**

21

22 BACKGROUND - Lack of skilled human resources in primary care remains a major concern for  
23 policymakers in low- and middle-income countries. There is little evidence supporting the  
24 impact of residency training in family medicine in the quality of care, and it perpetuates  
25 misconceptions among policymakers that the provision of primary care can be easily done by  
26 any physician without special training.

27 METHODS - This article compares the risk of patients being hospitalized due to Ambulatory  
28 care sensitive conditions and the odds of having follow-up visits in primary care after  
29 hospital discharge, according to the type of their medical provider: (1) Generalists  
30 (reference), (2) Family physicians; and, (3) patients with no consultations prior to the event.  
31 Multilevel multivariate binomial regression models estimated the relative risks of a patient  
32 being hospitalized in a given month and the relative risks for the occurrence of a follow-up  
33 visit in primary care in a retrospective cohort of 636.640 patients between January 2013 and  
34 July 2018 in Rio de Janeiro.

35 FINDINGS - For all 14 conditions, there was a higher risk of hospitalization when patients had  
36 no consultation in primary care prior to the event. Except for Ear, Nose and Throat  
37 infections, patients seen by family physicians had a lower risk of being hospitalized,  
38 compared to patients seen by Generalists. Follow-up visits were more likely to happen  
39 among patients treated by family physicians for almost every condition analyzed.

40 CONCLUSION - With two years of training in family medicine, Family physicians can reduce  
41 the risk of their patients being hospitalized and increase the likelihood of those patients  
42 having a follow-up consultation in primary care. Investments in residency training in family

43 medicine should be made to fix the shortage of skilled physicians in primary care, reduce  
44 hospitalizations and improve quality and continuity of care.

45

46 **Keywords:** Primary Health Care, Family Practice, Health Workforce, Developing Countries

47 **INTRODUCTION**

48

49 Hospital admissions have been used over the last 30 years as a valuable indicator of  
50 the effectiveness of Primary Health Care (PHC).<sup>1</sup> Health conditions for which good quality,  
51 timely and effective primary care can prevent hospitalization are known as ambulatory-care  
52 sensitive conditions (ACSC). Good quality PHC services can change the course of these health  
53 conditions, making a hospital admission less likely to happen.<sup>2,3</sup> High rates of hospitalizations  
54 due to ACSC would represent the provision of suboptimal PHC to the community.

55 This concept has been used worldwide to measure the impact of PHC initiatives,  
56 policies, and services,<sup>4-7</sup> and in Brazil to show the impact of the Family Health Strategy<sup>8</sup>  
57 (FHS), a federal policy that organizes the public PHC system, providing the structure and  
58 financial resources for Family Health Teams (FHTs). The FHS today – with nearly 43 000 FHTs  
59 in place – is responsible for the provision of PHC for 64% of the Brazilian population.<sup>9,10</sup> Over  
60 its 25 years of implementation, many achievements have been reported, such as the  
61 reduction of infant, neonatal,<sup>11-13</sup> and cardiovascular deaths,<sup>14,15</sup> and for the reduction of  
62 hospital admissions due to ACSC,<sup>16</sup> and among older adults.<sup>17,18</sup>

63 However, the lack of trained human resources in PHC remains a major concern for  
64 policymakers in low- and middle-income countries. Recent policies – the More Doctors and  
65 the Doctors for Brazil programs – have tried to promote provision and fixation of physicians  
66 in underserved areas.<sup>19,20</sup> Nonetheless, the vast majority of doctors working at the FHS have  
67 no training in family medicine (FM).<sup>21</sup> Despite the recent incentives to boost residency  
68 training in family medicine (RTFM) in the country, with less than 4% of the total number of  
69 vacancies for residency training dedicated to FM,<sup>22</sup> this picture is far away from being  
70 changed. Unfortunately, there is little of evidence showing the impact of RTFM on the

71 quality of care, and it perpetuates misconceptions among policymakers that the provision of  
72 primary care can be easily done by any physician without RTFM.

73 This study tests the hypothesis that RTFM can make doctors more capable of  
74 providing good quality primary care and prevent the occurrence of hospitalizations due to  
75 ACSC. The rationale behind this argument is that during two years of RTFM, FPs would  
76 develop the skills and competencies needed to better manage a wider set of conditions in  
77 primary care, thus preventing unnecessary hospital admissions. This article aims to (1)  
78 compare the risk of patients being hospitalized due to ACSC and (2) the odds of a patient  
79 having follow-up visits in primary care after hospital discharge, according to the type of  
80 training of their medical health care provider. Finally, it (3) estimates the population  
81 attributable fraction and the absolute change in hospital admissions per year in the sample  
82 that would happen if all medical consultations were performed by specialists in family  
83 medicine.

84

85

## 86 **METHODS**

87

### 88 **STUDY DESIGN AND DATA SOURCE**

89

90 A retrospective longitudinal analysis of medical consultations in primary care and  
91 hospital admissions in the Rio de Janeiro municipality was performed using patients'  
92 information from electronic health records and from the National Hospital Admissions  
93 System. Deterministic linkage combining patient's name, date of birth, mother's name,  
94 gender and patient's address was performed and false-positive matches between the

95 datasets were excluded after manual review. Patients' consent was not necessary since only  
96 anonymized information was used during the study and the Rio de Janeiro Municipal Health  
97 Department, the actual caretaker of this information, gave the consent to use this dataset  
98 for this research. The study was approved by the Rio de Janeiro Municipal Health  
99 Department research ethics board and it is registered under the number  
100 03795118.0.0000.5279. It was conducted in accordance with the 466/12 resolution from the  
101 Brazilian National Health Council and the Declaration of Helsinki.

102

103

104

#### 105 EXPOSURE AND INDEPENDENT VARIABLES

106

107 Physicians were categorized according to their type of formal training to work in PHC:  
108 (1) Generalists, i.e. doctors without RTFM, were considered as the reference category; and  
109 (2) Family physicians (FPs) – graduated FPs, FM preceptors and residents enrolled in the FM  
110 residency programs. Patients that were hospitalized but had no consultations in primary care  
111 prior to the event were categorized as (3) “No consultation prior”.

112 Residents and preceptors in FM share responsibilities for the same patients at the  
113 same FHT for two years of training and the decisions the residents make are usually  
114 supervised by their preceptor, hence they were both considered as FPs. Residents work 48  
115 hours per week under the full supervision of FM preceptors in a community-based primary  
116 care clinic. They have learning sessions every week addressing topics of FM and PHC and  
117 clinical content about the most prevalent health conditions in primary care. All learning  
118 activities the residents must take during the course are designed in line with the National

119 Committee for Medical Residencies and with the Brazilian Society of Family and Community  
120 Medicine (SBMFC).<sup>23</sup> Information about other forms of post-graduate training or  
121 specialization was not available and were not taken into account, nor the number of years in  
122 practice for any doctor.

123 Patients contributed to the models with information about (1) age (continuous), (2)  
124 sex, and (3) the Charlson Comorbidity Index.<sup>24</sup> Each patient contribute only from the date of  
125 subscription at the clinic until the last day available at the dataset, or the day the patient was  
126 unsubscribed or the date of death. The Social Development Index (SDI) was used to bring  
127 information about the context where the patient lives. The SDI is a linear scale combining  
128 information about sanitation, schooling, income, and housing conditions from every  
129 household in the FHT catchment area, representing the grade of social development of a  
130 neighborhood. Hence, patients registered in the same FHT have the same SDI. It varies from  
131 0 (least developed) to 1 (most developed).

132 All clinics and FHT in this sample have the same physical structure, offices equipped  
133 with computer, printer, medical equipment, room for small surgical procedures, the same  
134 arsenal of laboratory tests and medicines in the pharmacy, and the same type of human  
135 resources available: nurses, technicians, dentists, pharmacists, and managers. The  
136 distribution of doctors among different clinics and FHT didn't follow any criteria that is  
137 known to interfere and generate confounding in the relationship between the medical  
138 categories, the population assisted, and the study outcomes.

139

140

141 OUTCOMES

142

143 Two outcomes were considered in this study: (1) The occurrence of hospital  
144 admissions, and (2) the occurrence of a follow-up visit in primary care in the following two,  
145 four, and six months after patient's discharge from the hospital.

146 Fourteen health conditions from the Brazilian list of Ambulatory-care Sensitive  
147 Conditions (ICSAP-Brazil) were analyzed. ICD-10 codes and clinical criteria for each condition  
148 were used to identify both population-at-risk and the event, i.e. the hospital admissions –  
149 table 1. Both hospital admissions and follow up visits were considered as binary events, i.e.  
150 being or not being hospitalized in a given month among those at risk and having or not  
151 having one medical consultation within 60 days, 120 days, or 180 days after being discharged  
152 from the hospital. For the follow-up visits, patients that were hospitalized and have not died  
153 during hospitalization were considered as the population-at-risk.

154 By studying both phenomena here we aim to capture both sides of coordination of  
155 care between primary and secondary/tertiary care. If RTFM can make doctors more  
156 competent to work in primary care, it will make hospital admissions less likely to occur and,  
157 at the same time, for those patients that have been hospitalized, it will make a follow-up  
158 visit more likely to occur.

159

160

## 161 STATISTICAL ANALYSES

162

163 Multilevel multivariate binomial regression models estimated the relative risks (RR)  
164 of a patient being hospitalized in a given month and the RR for the occurrence of a follow-up  
165 visit, according to the type of doctor taking care of the patient, i.e. (1) Generalists  
166 (reference), (2) FPs, and, for those with no consultations prior to the event, (3) “No



167 consultation prior". A two levels hierarchical data structures was created clustering months  
168 within patients. This nested design was used in order to regard the data dependence.

169 For follow-up visits in primary care, only patients that were hospitalized and did not  
170 die during hospitalization were considered as population-at-risk. Time effects were regarded  
171 using dummy variables for months and years. All models were adjusted for patient  
172 information (sex, age, and Charlson comorbidity index) and contextual information (SDI and  
173 time). For both acute and chronic conditions, patients were considered "at risk" during the  
174 whole period they were subscribed at the clinic. For Pregnancy related hospital-admissions,  
175 only pregnant women and women during the puerperium were considered as patients-at-  
176 risk.

177 Finally, Population Attributable Fraction (PAF) for each outcome was calculated using  
178 the RR from the regression models to estimate the absolute change In terms of number of  
179 hospital admissions per year in the sample that would happen if all medical consultations  
180 were performed by trained FPs. Data processing and statistical analysis were performed  
181 using R version 3.6.2 and lme4 package.

182

183

184

## 185 **RESULTS**

186

187 From the original list of 636.640 patients (376.204 women and 261.432 men),  
188 457.533 (184.505 men and 273.662 women) were subscribed in 195 FHTs and 30 different  
189 PHC clinics. From the patients assigned to one FHT, 406.271 patients were responsible for  
190 2.433.924 medical consultations between January 2013 and December 2018, and for 80.314

191 hospital admissions between January 2013 and July 2018 that occurred among 59,106  
192 different patients.

193 For all 14 domains studied and for both hierarchical models, there was a higher risk  
194 of hospitalization when patients had no consultation in primary care prior to the event. This  
195 effect was higher when the cause of hospitalization was due to Stroke, Gastroenteritis and  
196 Pelvic inflammatory disease, and had its smallest value in cases of Asthma and Epilepsy.

197 Except for Ear, Nose and Throat infections, patients seen by FPs tended to have a  
198 lower risk of being hospitalized, compared to patients seen by Generalists. This effect was  
199 greater in hospital admissions due to Asthma, Pneumonias in adults, Gastroenteritis, Heart  
200 failure and Pneumonia in children.

201 In absolute numbers, Heart failure, Angina pectoris, Pneumonias in adults would  
202 express the biggest decrease in the total number of hospital admissions, with 68, 61 and 59  
203 fewer hospitalizations every year, if all doctors working in FHTs were trained in FM residency  
204 programs (table 3). In this scenario, there could be a 47% reduction in hospital admissions  
205 for Asthma, a 50% reduction in Pneumonia in adults and a 31% reduction in Pelvic  
206 inflammatory diseases.

207 For follow-up visits (table 4), patients that had no prior visit at the clinic before  
208 hospitalization were less likely than those seen by Generalists to have a follow-up  
209 consultation in primary care after hospital discharge. This effect is almost the same for  
210 consultations within two, four and six months. Oppositely, follow-up visits were more likely  
211 to happen among patients treated in FHTs with FPs for almost all conditions analyzed.  
212 Patients treated by FPs that were hospitalized for Heart failure and Angina pectoris had a  
213 consistent higher odds of having follow-up consultations. The exceptions were hospital

214 admissions due to Pregnancy-related and Gastroenteritis, where the odds of a follow-up  
215 consultation happening were the same for patients seen by Generalists and FPs.

216

217

218

## 219 **DISCUSSION**

220

221 By way of clarification, the comparisons made here between Generalists and FPs are  
222 not judgmental and we believe that all doctors in this sample were doing their best to help  
223 their patients. We aimed solely to test the hypothesis that the addition of two years of  
224 training in family medicine, on top of the current six years of medical school in Brazil,  
225 modifies the risk of patients being hospitalized.

226

### 227 **First aim – impact of RTFM on the risk of hospital admissions due to ACSC**

228

229 With two years of training in family medicine, Family physicians working in primary  
230 care can reduce the risk of their patients being hospitalized for all fourteen health conditions  
231 from the Brazilian list of Ambulatory-care Sensitive Conditions (ICSAP-Brazil), except for Ear,  
232 nose and throat infections. Moreover, patients subscribed to a FHT that had no  
233 consultations at the clinic were at a higher risk of been hospitalized for all conditions,  
234 compared to patients treated by Generalists or Family physicians. These findings add  
235 important information to the well-established notion that the increased coverage of FHS in  
236 Brazilian municipalities leads to lower hospital admissions,<sup>5,16</sup> lower mortality from heart  
237 and cerebrovascular diseases,<sup>14</sup> and lower mortality from amenable conditions.<sup>15</sup> These

238 previous ecological studies, however, focused mainly on the number of FHTs available to the  
239 population, which translates to “the proportion of the population covered or not by a FHT in  
240 the municipality”. In other words, the higher the proportion of the population covered by  
241 the FHS in a municipality, the larger will be the impact on health outcomes. For the patients,  
242 being covered by a FHT – i.e., having one doctor, one nurse, one nurse-technician and  
243 community-health agents as a team of healthcare providers – makes the risk of a  
244 comprehensive list of events decrease, such as hospital admissions. What is new from our  
245 study is that the already known beneficial effect of being covered by a FHT increases if the  
246 doctor in charge is a Family physician. It also expands the evidence raised in previous studies  
247 showing that specialists in family medicine are more capable of detecting chronic health  
248 conditions, requesting fewer laboratory tests and fewer referrals to secondary care and  
249 providing more follow-up consultations to their patients in primary care.<sup>25,26</sup>

250

### 251 **Exploring the specific causes – infectious diseases**

252

253 Exploring the specific causes for hospital admissions, with the exception of Ear, nose  
254 & throat infections and – to a lesser extent – Skin infections, all infectious diseases had their  
255 risk decreased when a Family physician was present at the FHT. Pelvic inflammatory disease,  
256 Gastroenteritis, Pneumonia (children and adults) and Gastroenteritis were strongly affected  
257 by the presence of a FP at the FHT and in the case of Pneumonias in adults more than 50% of  
258 all cases could be avoided if all FHT in this samples had trained family physicians as their  
259 healthcare provider. In all these acute conditions, with the exception of Gastroenteritis, it is  
260 possible that the treatment will require the use of antibiotics, which is a matter of concern in  
261 a scenario where there is no shortage of these drugs and health professionals can freely

262 prescribe them. The prescription of antibiotics in ambulatory care is the subject of  
263 campaigns aiming to protect patients from unnecessary treatments and procedures.  
264 Choosing wisely is one of them and the rational use of antibiotics is a key competence that  
265 residents in FM need to develop.<sup>27</sup> Future studies will need to explore the previous use of  
266 antibiotics for these patients-at-risk. Even if there is no difference in the risk of Hospital  
267 admission, like in Ear, nose & throat infections, if a lower prescription of antibiotics is found,  
268 it can represent a gain in terms of good practice.

269 Hospital admissions due to Gastroenteritis (diarrhea and dehydration) would also be  
270 influenced by RTFM, with a lower risk (RR 0.49 – 95%CI 0.26; 0.90) favoring patients treated  
271 by FPs. This lower risk is very unexpected, since this is an acute condition easily treated by a  
272 cheap and widely available intervention (oral rehydration salts). Moreover, Gastroenteritis is  
273 not a condition that challenges doctors to identify and treat, like heart failure, HIV, or  
274 dementia. Initiatives like the Integrated Management of Childhood Illness initiative – AIDIPI  
275 in Brazil – have been tackling this issue for many years by task shifting a simple procedure  
276 that, most of the time, does not require medical care. Nevertheless, biomedical content  
277 learned during RTFM cannot be entirely responsible for the lower risk of hospital admissions  
278 due to Gastroenteritis. Developing skills and attitudes that are beyond biomedical content  
279 represents a paradigm shift for medical education and a key element present in many  
280 competency-based curriculum in family medicine around the world.<sup>23,28,29</sup>

281 One can speculate whether the development of relational, communication and time  
282 management skills could increase patients' trust in their doctors and change the way parents  
283 seek medical care for their sick children. The lower risk of Hospital admissions due to Asthma  
284 and Epilepsy for Family physicians can maybe be the consequence of the combination of  
285 these skills – clinical skills and competencies of family physicians. If patients with Asthma or

286 Epilepsy in the case of an acute event have access to a competent physician able to manage  
287 the acute situation, most of the time it will be solved in the primary care setting. Looking for  
288 an answer to this question would require studies designed to explore the interaction of  
289 these skills and competencies and their effect on healthcare. This is not a simple research  
290 question to be pursued but it could help to highlight the pathways in which RTFM makes this  
291 happen.

292

### 293 **Exploring the specific causes – chronic conditions**

294

295 Hypertension and Diabetes mellitus – Chronic cardiovascular conditions that play a  
296 major role as risk factors for cardiovascular outcomes – seemed to be less influenced by the  
297 presence of a FP in the FHT, when compared to Angina pectoris and Heart failure –  
298 outcomes that usually have Hypertension and Diabetes mellitus as their main causes. To a  
299 lesser degree, hospital admissions due to Stroke also seemed to be affected by the presence  
300 of FP in the FHT. There is a contradiction in these findings and it is reasonable to suppose that  
301 treating Hypertension and Diabetes mellitus would decrease in a higher extent the risk for  
302 hospital admissions due to these conditions, and not so much the risk for their final  
303 consequences.

304 Lowering diabetic patients' blood glucose reduces the risk of major cardiovascular  
305 events, especially for those patients with cardiovascular disease at baseline.<sup>30</sup> Reducing  
306 systolic blood pressure significantly reduces coronary heart disease, stroke, and heart  
307 failure, with the effect increasing in that order.<sup>31</sup> However, these measures would affect  
308 primarily Hypertension and Diabetes mellitus, and a larger effect in the reduction of hospital  
309 admissions should be expected. However, different population-at-risk were considered for

310 each outcome. For Hypertension, all patients with blood pressure higher than 140/90 mmHg  
311 were included as patients-at-risk of being hospitalized – the same procedure was  
312 undertaken for every condition. Hence, the population-at-risk for Diabetes mellitus and  
313 Hypertension ended up including patients with different health statuses – from mild cases  
314 that require no more than lifestyle changes and one diuretic pill, to more severe cases with  
315 multimorbidity and polypharmacy involved, with an extensive list of medicines, insulin  
316 regimens, and a higher morbidity burden. On the other hand, all patients-at-risk for Angina  
317 pectoris, Stroke and Heart failure had been diagnosed (at the hospital or at the primary care  
318 clinic) for these conditions, making all of them high-risk patients. The differences in terms of  
319 their health status are smaller, hence the population-at-risk for these conditions are more  
320 homogenous than that for Hypertension and Diabetes mellitus.

321

322 **Second aim – risk of patients having follow-up consultations in primary care after hospital**  
323 **discharge**

324

325 Information on follow-ups also highlights an important aspect for the study of PHC  
326 and hospital admissions, which is continuity of care. Not only the risk of hospitalization was  
327 lower among patients treated by Family physicians but, for most conditions in our list, RTFM  
328 makes follow-up visits after hospital discharge more likely to happen. Since health care do  
329 not cease after hospital discharge, it seems that RTFM is also important in promoting  
330 continuity and coordination of care, making medical consultations more likely to happen  
331 after hospitalization. When compared to patients that had no consultation prior to the  
332 hospital admission (covered but not using the FHS), patients using their FHT as healthcare  
333 providers were more likely to have follow-up consultations. It is hard to tell what are the

334 reasons for these patients to have fewer follow-up visits at the PHC clinic after hospital  
335 discharge. The same can be said about the reasons for these patients not to use their FHT  
336 before the hospital admission. Personal preferences for another healthcare service (private  
337 out-of-pocket or private health insurance), poor selfcare, and barriers to access the public  
338 primary care clinic are some possible reasons that should be explored in future studies.

339

### 340 **Third aim – absolute reduction in hospital admissions**

341

342 Reporting the Population attributable fraction and the total number of hospital  
343 admissions avoided in a year can better translate the information reported as relative risks  
344 into meaningful information for policymakers and healthcare managers. In table 4 the  
345 relative risks are expressed in terms of the absolute number of hospital admissions that  
346 would happen if all FHTs had a family medicine specialist as medical provider. Some  
347 conditions would experience a big relative change with a small absolute reduction in the  
348 number of hospital admissions. This is the case for Asthma and Pelvic inflammatory disease.  
349 Even with 47% and 31 % fewer hospital admissions every year, the total number of events  
350 avoided would be only 26 and 13, respectively. Meanwhile, Angina pectoris and Heart failure  
351 – conditions with a larger number of hospital admissions per year – would experience a large  
352 absolute reduction of events (61 and 68, respectively), even with a lower relative risk  
353 reduction between family physicians and generalists.

354 Every avoided hospitalization due to ambulatory care sensitive conditions represents  
355 healthcare resources that are saved to better use with patients in need. Moreover, health  
356 care conditions will be differently affected by RTFM (relative risks) but will also result in  
357 different number of events, with different costs and different time number of days in the



358 hospital. This dimension of the impact that RTFM can make in patient care was not  
359 measured in our study but would be an interesting focus for future research exploring  
360 duration of stay, quality of life and outcomes related to the very hospital admission.

361

362

### 363 **Methodological considerations and implications for future research**

364

365 Exploring in detail the ways that Family physicians interact with their patients to  
366 change the life course of these conditions was not the aim of this study. Future research  
367 describing more precisely these populations-at-risk would be extremely valuable to explore  
368 the actions taken by family physicians and their patients during their health care trajectory  
369 that are responsible for lowering the risk for hospital admissions. Furthermore, each health  
370 condition in each patient might have a different time lapse to change under the effect of  
371 having a Family physician as his/her medical professional. Prenatal care issues and other  
372 acute conditions are more likely to be affected in a short term. A urinary tract infection in a  
373 pregnant woman develops over the period of one month (from the first symptoms to its  
374 resolution). On the contrary, chronic conditions resulting from years of exposure to risk  
375 factors will lead patients to a series of appointments, blood tests, follow-ups, changes in  
376 drug treatments.

377 In the case of Pregnancy related conditions, the lower risk of a women being  
378 hospitalized when a Family physician is responsible for her prenatal care is not followed by a  
379 change in the risk of having follow-up visits after hospital discharge. This information shows  
380 us that, in this sample, there were doctors available in the FHT to see these women after

381 hospital discharge. Probably there was a doctor in that FHT before a hospital admission has  
382 occurred as well.

383 Hospital admissions avoided and follow-up visits after hospital discharge are only the  
384 tip of the iceberg. FPs can prevent these hospital admissions on top of changing a series of  
385 events that happen every day, such as the detection of health conditions, follow up  
386 consultations, procedures, prescriptions, and referrals to secondary care.

387 The ICSAP-Brazil creates a comprehensive list of conditions to explore and measure  
388 the effectiveness of PHC services, but it keeps out of its framework conditions that are  
389 widely prevalent in the community, such as Mental health conditions, HIV/AIDS, and Cancer.  
390 Those are some examples of prevalent conditions that might have the risk of hospitalization  
391 affected by strong PHC services and, moreover, by skilled Family physicians. Expanding the  
392 scope of health care conditions would be necessary to further explore in which extent RTFM  
393 affects the occurrence of hospital admissions.

394

### 395 **Implications for healthcare**

396

397 The World Health Organization in 2020 published the Operational Framework for  
398 Primary Health Care<sup>32</sup> describing the health care workforce as one of the 14 strategic levers  
399 to enable the development of PHC. Since the inauguration of the FHS in 1994,<sup>8</sup> some of the  
400 14 levers were prioritized: an organized model of care was established for the whole  
401 country, strengthening governance and social participation, and creating policy frameworks  
402 organizing the way PHC should be funded, delivered and how resources should be allocated.

403 As mentioned before, the More Doctors and the Doctors for Brazil programs are good  
404 examples of policies that have tried to move the Healthcare workforce lever up, promoting

405 provision and fixation of physicians in underserved areas. This is specially important when  
406 we look at the relative risks for Hospital admissions between patients with no consultation  
407 prior compared to those seen a Generalist. In a city with one of the highest density of  
408 doctors in the country,<sup>22</sup> having a Family physician as a medical healthcare provider is  
409 beneficial to decrease the number of Hospital admissions but having consultations with a  
410 physician and using the FHT is crucial. For the rest of the country and especially in remotes  
411 areas, it is essential that the federal government fixes this inequality by providing physicians  
412 for places that can hardly get any.

413         Nevertheless, one more step must be taken by the federal government to leverage  
414 this lever, which is to fix the unequal distribution of vacancies for residency training in the  
415 country by increasing the number of seats for family medicine and redistributing these seats  
416 across the country. The political structure for these programs is already in place and the  
417 financial resources are available. In other words, the country already has the foundation to  
418 build a national program for provision, fixation and training of physicians in primary care  
419 aligned with the established family medicine residency programs.

420         Only with investments in RTFM it will be possible to fix the shortage of skilled  
421 physicians we see today in Brazilian PHC.<sup>21,22</sup> To make it happen, we need to correct  
422 common misconceptions among policymakers that doctors do not need residency training to  
423 work in primary care.

424

425

426

427 **STRENGTHS AND LIMITATIONS**

428

429           The main limitation of our study is the lack of information regarding the usage of  
430 emergency care services in the city to fully cover all paths between primary care and hospital  
431 care. These services play an important role in managing every domain at the ICSAP-Brazil list,  
432 especially acute conditions and exacerbations of chronic diseases. Certainly, these services  
433 can avoid hospitalizations by providing short term treatment, and discharging patients to  
434 complete their treatment at home. Another limitation is the lack of information about  
435 private health care services in the community. Having the complete information would help  
436 to clarify if patients were sent to the hospital by the public primary care clinic, by a private  
437 clinic or by the emergency service, providing better information to clarify if there was a lack  
438 of access to the FHTs.

439           Relative risks, most of the time, cannot reach a broad audience. By reporting the  
440 population attributable fraction, we tried to translate relative risks into absolute numbers to  
441 provide more palatable information for decision makers and politicians get better  
442 understanding of the impact of RTFM. The total number of hospital admissions that would  
443 be added or taken if all FHTs had trained Family physicians as their medical provider can  
444 more easily reach those responsible for deciding to implement an educational initiative for  
445 capacity building of human resources for primary care.

446           Finally, using real-world data to analyze an actual intervention in a middle-income  
447 country may reverberate better to other countries that are also trying to expand and  
448 improve their PHC systems.

449

450

451 **CONCLUSION**

452

453           The Brazilian Family Health Strategy has been responsible for an impressive impact  
454 on public health for the last 25 years, decreasing health inequalities by strengthening  
455 governance and providing structure and financial support for FHTs in the whole country.  
456 Only recently, capacity building of human resources for primary care – especially residency  
457 training in family medicine – has been considered as an important piece for the success of  
458 this national policy. In this study, we presented evidence that public investments in capacity  
459 building of human resources for primary care can prevent the occurrence of hospital  
460 admissions.

461           It will take a lot of effort from all stakeholders and political will to allocate financial  
462 resources today in educational initiatives that will take some years to pay back in health  
463 outcomes the investment made. In the case of the medical workforce for primary care –  
464 especially in LMIC – this will not be achieved without investments in residency training in  
465 family medicine.

466

467

Table 1: List of health conditions according to their ICD10 codes and clinical criteria and respective population-at-risk used in the regression models.

| Domain/condition            | ICD10 codes, clinical criteria or procedure           | Population-at-risk                                                                    |
|-----------------------------|-------------------------------------------------------|---------------------------------------------------------------------------------------|
| <b>ICSAP-Brazil</b>         |                                                       |                                                                                       |
| Hypertension                | I10, I11                                              | I10, I11, and at least one SBP $\geq$ 140 mmHg or DBP $\geq$ 90 mmHg                  |
| Diabetes mellitus           | E10, E11, E12, E13, E14                               | E10-E14, and at least one glycemia > 126 mg/dl or A1C hemoglobin > 6.5%               |
| Stroke                      | I63, I64, I65, I66, I67, I69, G45, G46                | Patients with Diabetes, Hypertension, Ischemic heart disease, Stroke or Heart failure |
| Angina pectoris             | I20                                                   | Older than 40 years old                                                               |
| Heart failure               | I50, J81                                              | Younger than 12 years old                                                             |
| Epilepsy                    | G40, G41, R56                                         | Older than 40 years old                                                               |
| Asthma                      | J45, J46                                              | Younger than 12 years old                                                             |
| Pregnancy related           | O23, A50, P350                                        | Women during pregnancy or puerperium                                                  |
| Gastroenteritis             | E86, A00, A01, A02, A03, A04, A05, A06, A07, A08, A09 | Younger than 12 years old                                                             |
| Pneumonias - children       | J13, J14, J153, J154, J158, J159, J181                | Younger than 12 years old                                                             |
| Pneumonias - adults         | J13, J14, J153, J154, J158, J159, J181                | Older than 40 years old                                                               |
| Skin infection              | A46, L01, L02, L03, L04, L08                          | Younger than 12 years old                                                             |
| Ear, nose & throat          | H66, J00, J01, J02, J03, J06, J31                     | Younger than 12 years old                                                             |
| Pelvic inflammatory disease | N70, N71, N72, N73, N75, N76                          | Women (14 -50 years old)                                                              |

468

469

Table 2: Number of medical consultations and patients' characteristics according to each medical category in the study sample. Rio de Janeiro, Brazil, 2015 – 2018.

| Medical category  | Number of doctors – N (%) | Consultations – N (%) | SDI -mean (SD) | Patients' age (%) |             |      | Patients according to sex – N (%) |                |
|-------------------|---------------------------|-----------------------|----------------|-------------------|-------------|------|-----------------------------------|----------------|
|                   |                           |                       |                | < 18              | > 18 & < 45 | > 45 | Women                             | men            |
| Generalists       | 633 (75.6)                | 1.629.235 (67.5)      | 0.573 (0.03)   | 21.3              | 31.8        | 46.9 | 1.067.212 (65.6)                  | 562.023 (34.4) |
| Family physicians | 204 (24.4)                | 785.273 (32.5)        | 0.585 (0.03)   | 18.5              | 34.5        | 47.0 | 517.813 (65.9)                    | 267.460 (34.1) |

470

471

472

Table 3: Relative risks for hospital admissions from January 2013 to July 2018 according to the proportion of consultations performed by Family physicians or Generalists in a Family Health Team in Primary Care. Rio de Janeiro, Brazil. 2013-2018.

|                             | Family physicians | No consultation prior |
|-----------------------------|-------------------|-----------------------|
| Hypertension                | 0.83 (0.61; 1.15) | 2.63 (2.04; 3.40)     |
| Diabetes mellitus           | 0.76 (0.56; 1.04) | 2.75 (2.11; 3.60)     |
| Stroke                      | 0.74 (0.58; 0.95) | 5.47 (4.50; 6.65)     |
| Angina pectoris             | 0.62 (0.51; 0.75) | 2.58 (2.19; 3.03)     |
| Heart failure               | 0.52 (0.40; 0.67) | 2.78 (2.19; 3.53)     |
| Epilepsy                    | 0.79 (0.57; 1.11) | 1.40 (1.07; 1.83)     |
| Asthma                      | 0.35 (0.21; 0.57) | 1.46 (1.04; 2.05)     |
| Pregnancy related           | 0.78 (0.60; 1.01) | 2.89 (2.30; 3.63)     |
| Gastroenteritis             | 0.45 (0.25; 0.79) | 3.17 (2.19; 4.59)     |
| Pneumonias - children       | 0.57 (0.42; 0.77) | 2.19 (1.74; 2.76)     |
| Pneumonias - adults         | 0.36 (0.24; 0.56) | 2.90 (2.13; 3.95)     |
| Skin infection              | 0.82 (0.69; 0.97) | 2.61 (2.23; 3.00)     |
| Ear, nose & throat          | 1.06 (0.64; 1.77) | 1.78 (1.13; 2.83)     |
| Pelvic inflammatory disease | 0.59 (0.38; 0.93) | 3.35 (2.34; 4.81)     |

Multilevel multivariate binomial regression models adjusted for age, sex, time, and the Social development index of the area covered by the FHT.

473



474

Table 4: Population attributable fraction and the absolute change in the number of hospital admissions in 12 months in a scenario where all Family Health Teams in the sample would have trained Family physicians as medical professionals. Rio de Janeiro, Brazil, 2013-2018.

| Conditions                  | Population at risk | HA* per year | Population attributable fraction PAF (%) | Number of HA added or taken |
|-----------------------------|--------------------|--------------|------------------------------------------|-----------------------------|
| Hypertension                | 91958              | 128          | -3.5 (-25.1; 20.9)                       | -4 (-32; +27)               |
| Diabetes mellitus           | 38784              | 160          | -12.2 (-31.2; 9.7)                       | -17 (-43; +13)              |
| Stroke                      | 4807               | 244          | -13 (-28.6; 4.7)                         | -32 (-70; +11)              |
| Angina pectoris             | 4277               | 271          | -22.6 (-10; -33.9)                       | -61 (-92; -27)              |
| Heart failure               | 2617               | 230          | -29.4 (-13; -43.4)                       | -68 (-100; -30)             |
| Epilepsy                    | 449                | 86           | -15.3 (-33.9; 7.2)                       | -13 (-29; 6)                |
| Asthma                      | 5514               | 54           | -47.4 (-67.1; 20.9)                      | -26 (-36; 11)               |
| Pregnancy related           | 45445              | 136          | -16.1 (-32.1; 1.4)                       | -22 (-44; 2)                |
| Gastroenteritis             | 5858               | 45           | -41.5 (-66; -7)                          | -19 (-30; -3)               |
| Pneumonias - children       | 2319               | 114          | -28.6 (-45.4; -9.2)                      | -33 (-52; -10)              |
| Pneumonias - adults         | 2777               | 116          | -50.5 (-67.1; -27.7)                     | -59 (-78; -32)              |
| Skin infection              | 33126              | 331          | -5.6 (-18.5; 7.2)                        | -19 (-61; 24)               |
| Ear, nose & throat          | 78059              | 28           | 0 (-39.9; 33.0)                          | 0 (-11; 9)                  |
| Pelvic inflammatory disease | 4044               | 41           | -31.2 (-52.6; -2.8)                      | -13 (-22; -1)               |

\* Hospital admissions

Population attributable fraction estimated using relative risks from two level multilevel multivariate binomial regression models, using a initial proportion of 30% of family physicians.

475

476

Table 5: Relative risks for a patient having a follow-up consultation in primary care after one, three, and six months after hospital discharge according to the proportion of medical consultations performed by Family physicians or Generalists in a Family Health Team in the previous twelve months. Rio de Janeiro, Brazil.

|                              | 2 months           | 4 months          | 6 months          |
|------------------------------|--------------------|-------------------|-------------------|
| <b>Family physicians</b>     |                    |                   |                   |
| Hypertension                 | 1.19 (0.55-2.55)   | 1.11 (0.49-2.48)  | 1.22 (0.5-2.93)   |
| Diabetes mellitus            | 1.30 (0.66-2.54)   | 1.26 (0.58-2.72)  | 1.54 (0.69-3.45)  |
| Stroke                       | 1.43 (0.84-2.43)   | 2.2 (1.21-3.99)   | 1.8 (0.97-3.32)   |
| Angina pectoris              | 2.1 (1.33-3.31)    | 1.78 (1.11-2.87)  | 1.94 (1.15-3.28)  |
| Heart failure                | 3.09 (1.63; 5.88)  | 3.50 (1.80; 6.82) | 3.33 (1.67; 6.62) |
| Epilepsy                     | 1.81 (0.74; 4.41)  | 2.05 (0.83; 5.09) | 1.69 (0.68; 4.21) |
| Asthma                       | 1.07 (0.30; 3.81)  | 1.30 (0.41; 4.10) | 0.95 (0.29; 3.12) |
| Pregnancy related            | 1.17 (0.66; 2.07)  | 0.90 (0.48; 1.70) | 0.87 (0.44; 1.72) |
| Gastroenteritis              | 1.08 (0.24; 4.93)  | 1.56 (0.37; 6.50) | 0.96 (0.23; 4.10) |
| Pneumonias - children        | 1.84 (0.95; 3.56)  | 2.92 (1.40; 6.07) | 3.18 (1.49; 6.78) |
| Pneumonias - adults          | 3.93 (1.32; 11.68) | 2.60 (0.84; 8.01) | 2.08 (0.66; 6.57) |
| Skin infection               | 1.62 (1.12; 2.36)  | 1.39 (0.95; 2.02) | 1.30 (0.88; 1.93) |
| Ear, nose & throat           | 1.72 (0.42; 7.02)  | 2.24 (0.55; 9.15) | 1.28 (0.34; 4.79) |
| Pelvic inflammatory disease  | 1.12 (0.36-3.51)   | 2.10 (0.70-6.27)  | 1.17 (0.38-3.57)  |
| <b>No consultation prior</b> |                    |                   |                   |
| Hypertension                 | 0.09 (0.04-0.22)   | 0.09 (0.04-0.19)  | 0.13 (0.06-0.29)  |
| Diabetes mellitus            | 0.27 (0.14-0.52)   | 0.21 (0.11-0.43)  | 0.22 (0.11-0.43)  |
| Stroke                       | 0.23 (0.15-0.34)   | 0.30 (0.20-0.44)  | 0.27 (0.18-0.40)  |
| Angina pectoris              | 0.23 (0.16-0.34)   | 0.17 (0.12-0.25)  | 0.17 (0.12-0.24)  |
| Heart failure                | 0.18 (0.10; 0.33)  | 0.28 (0.16; 0.47) | 0.27 (0.16; 0.46) |
| Epilepsy                     | 0.15 (0.06; 0.36)  | 0.12 (0.05; 0.28) | 0.12 (0.05; 0.27) |
| Asthma                       | 0.21 (0.06; 0.71)  | 0.26 (0.09; 0.75) | 0.20 (0.07; 0.57) |
| Pregnancy related            | 0.39 (0.21; 0.75)  | 0.32 (0.17; 0.60) | 0.39 (0.20; 0.78) |
| Gastroenteritis              | 0.52 (0.17; 1.61)  | 0.56 (0.21; 1.49) | 0.59 (0.23; 1.54) |
| Pneumonias - children        | 0.51 (0.28; 0.92)  | 0.44 (0.25; 0.79) | 0.54 (0.31; 0.95) |
| Pneumonias - adults          | 0.45 (0.20; 1.04)  | 0.17 (0.07; 0.39) | 0.22 (0.10; 0.48) |
| Skin infection               | 0.50 (0.36; 0.70)  | 0.45 (0.33; 0.62) | 0.39 (0.29; 0.53) |
| Ear, nose & throat           | 0.14 (0.02; 0.80)  | 0.39 (0.11; 1.42) | 0.33 (0.10; 1.08) |
| Pelvic inflammatory disease  | 0.15 (0.05-0.49)   | 0.11 (0.04-0.33)  | 0.10 (0.04-0.27)  |

All models were adjusted for age, sex, time, and the Social development index of the area covered by the FHT.

477

478 **REFERENCES**

479

- 480 1. Homar JC, Matutano CC. La evaluación de la atención primaria y las hospitalizaciones  
481 por ambulatory care sensitive conditions. Marco conceptual. *Atención primaria*.  
482 2003;31(1):61-65. doi:10.1016/S0212-6567(03)70662-3
- 483 2. Starfield B, Shi L, Macinko J. Contribution of Primary Care to Health Systems and  
484 Health. *Milbank Q*. 2005;83(3):457–502. doi:10.1111/j.1468-0009.2005.00409.x
- 485 3. Billings J, Zeitel L, Lukomnik J, Carey TS, Blank AE, Newman L. Impact Of  
486 Socioeconomic Status On Hospital Use In New York City. *Health Aff*. 1993;12(1):162-  
487 173. <https://www.healthaffairs.org/doi/pdf/10.1377/hlthaff.12.1.162>.
- 488 4. Niti M, Ng T. Avoidable hospitalisation rates in Singapore, 1991–1998: assessing  
489 trends and inequities of quality in primary care. *Public Heal Policy Pract*.  
490 2003;57(1):17-22. doi:10.1136/jech.57.1.17
- 491 5. Dourado I, Oliveira VB, Aquino R, et al. Trends in Primary Health Care-sensitive  
492 Conditions in Brazil. *Med Care*. 2011;49(6):577-584.  
493 doi:10.1097/MLR.0b013e31820fc39f
- 494 6. Afonso MPD, Shimizu HE, Merchan-Hamann E, Ramalho WM, Afonso T. Association  
495 between hospitalisation for ambulatory care-sensitive conditions and primary health  
496 care physician specialisation: A cross-sectional ecological study in Curitiba (Brazil).  
497 *BMJ Open*. 2017. doi:10.1136/bmjopen-2016-015322
- 498 7. Gonçalves MR, Hauser L, Prestes IV, Schmidt MI, Duncan BB, Harzheim E. Primary  
499 health care quality and hospitalizations for ambulatory care sensitive conditions in the  
500 public health system in Porto Alegre, Brazil. *Fam Pract*. 2016;33(3):238-242.  
501 doi:10.1093/fampra/cmz051
- 502 8. Macinko J, Harris MJ. Brazil’s Family Health Strategy — Delivering Community-Based  
503 Primary Care in a Universal Health System. *N Engl J Med*. 2015;372(23):2177-2181.  
504 doi:10.1056/NEJMp1501140
- 505 9. Barreto ML, Rasella D, Machado DB, et al. Monitoring and Evaluating Progress  
506 towards Universal Health Coverage in Brazil. *PLoS Med*. 2014;11(9):9-11.  
507 doi:10.1371/journal.pmed.1001692
- 508 10. Neves RG, Flores TR, Manjourany SSD, Nunes BP, Tomasi E. Time trend of Family  
509 Health Strategy coverage in Brazil, its Regions and Federative Units, 2006-2016.  
510 *Epidemiol Serv Saude*. 2016;27(34):1-8. doi:10.5123/S1679-49742018000300008
- 511 11. Rasella D, Aquino R, Barreto ML. Reducing Childhood Mortality From Diarrhea and  
512 Lower Respiratory Tract Infections in Brazil. *Pediatrics*. 2010;126(3).  
513 doi:10.1542/peds.2009-3197
- 514 12. Aquino R, Oliveira NF De, Barreto ML. Impact of the Family Health Program on Infant  
515 Mortality in Brazilian Municipalities. *Am J Public Health*. 2009;99(1):87-93.  
516 doi:10.2105/AJPH.2007.127480
- 517 13. Venancio SI, Etsuko T, Teresa M, Sanches C. Effectiveness of Family Health Strategy on  
518 child’s health indicators in São Paulo State. *Rev Bras Saúde Matern Infant*.  
519 2016;16(3):271-281. doi:http://dx.doi.org/10.1590/1806-93042016000300004
- 520 14. Rasella D, Harhay MO, Pamponet ML, Aquino R, Barreto ML. Impact of primary health  
521 care on mortality from heart and cerebrovascular diseases in Brazil: A nationwide  
522 analysis of longitudinal data. *BMJ*. 2014. doi:10.1136/bmj.g4014
- 523 15. Hone T, Rasella D, Barreto M, Atun R, Majeed A. Large Reductions In Amenable  
524 Mortality Associated With Brazil’s Primary Care Expansion And Strong Health

- 525 Governance. *Health Aff.* 2017;36(1):149-158. doi:10.1377/hlthaff.2016.0966
- 526 16. Mendonça CS, Harzheim E, Duncan BB, Nunes LN, Leyh W. Trends in hospitalizations  
527 for primary care sensitive conditions following the implementation of Family Health  
528 Teams in Belo Horizonte, Brazil. *Health Policy Plan.* 2012;27(4):348-355.  
529 doi:10.1093/heapol/czr043
- 530 17. Marques AP, Elena D, Montilla R. Hospitalization of older adults due to ambulatory  
531 care sensitive conditions. *Rev Saude Publica.* 2014;48(5):817-826. doi:10.1590/S0034-  
532 8910.2014048005133
- 533 18. Macinko BJ, Dourado I, Aquino R, et al. Major Expansion Of Primary Care In Brazil  
534 Linked To Decline In Unnecessary Hospitalization. *Health Aff.* 2010;29(12):2149-2160.  
535 <https://www.healthaffairs.org/doi/pdf/10.1377/hlthaff.2010.0251>.
- 536 19. Ministério da Saúde. *Programa Mais Médicos.*; 2017. doi:10.1590/1807-  
537 57622016.0520
- 538 20. Wollmann L, D'Avila OP, Harzheim E. Programa Médicos pelo Brasil: mérito e  
539 equidade. *Rev Bras Med Família e Comunidade.* 2019;15(42):1-6.
- 540 21. Augusto DK, David L, Oliveira DOPS de, Trindade TG da, Junior NL, Poli Neto P.  
541 Quantos médicos de família e comunidade temos no Brasil? *Rev Bras Med Família e*  
542 *Comunidade.* 2018;13(40):1-4. doi:http://dx.doi.org/10.5712/rbmfc13(40)1695
- 543 22. Mário Scheffer. *DEMOGRAFIA MÉDICA NO BRASIL 2018.* São Paulo; 2018.
- 544 23. SBMFC. Currículo Baseado em Competências para Medicina de Família e Comunidade.  
545 Currículo Baseado em Competências para Medicina de Família e Comunidade.  
546 [http://www.sbmfc.org.br/wp-content/uploads/media/Curriculo Baseado em](http://www.sbmfc.org.br/wp-content/uploads/media/Curriculo%20Baseado%20em%20Competencias(1).pdf)  
547 [Competencias\(1\).pdf](http://www.sbmfc.org.br/wp-content/uploads/media/Curriculo Baseado em). Published 2015. Accessed February 27, 2020.
- 548 24. Charlson M, Szatrowski TP, Peterson J, Gold J. Validation of a combined comorbidity  
549 index. *J Clin Epidemiol.* 1994. doi:10.1016/0895-4356(94)90129-5
- 550 25. Jantsch AG, Burström B, Nilsson GH, Leon AP De. Residency training in family medicine  
551 and its impact on coordination and continuity of care: an analysis of referrals to  
552 secondary care in Rio de Janeiro. *BMJ Open.* 2022;12:1-9. doi:10.1136/bmjopen-2021-  
553 051515
- 554 26. Jantsch AG, Burström B, Nilsson G, Leon AP De. Detection and follow-up of chronic  
555 health conditions in Rio de Janeiro – the impact of residency training in family  
556 medicine. *BMC Fam Pract.* 2021;22(223):1-11. doi:10.1186/s12875-021-01542-5
- 557 27. Levinson W, Kallewaard M, Bhatia RS, Wolfson D, Shortt S, Kerr EA. 'Choosing Wisely':  
558 a growing international campaign. *BMJ.* 2014;(December):1-9. doi:10.1136/bmjqs-  
559 2014-003821
- 560 28. Shaws E, Oandasan I, Fowler N. CanMEDS-FM 2017: A competency framework for  
561 family physicians across the continuum. The College of Family Physicians of Canada -  
562 Le Collège des Médecins de Famille du Canada.  
563 [https://www.cfpc.ca/uploadedFiles/Resources/Resource\\_Items/Health\\_Professionals](https://www.cfpc.ca/uploadedFiles/Resources/Resource_Items/Health_Professionals/CanMEDS-Family-Medicine-2017-ENG.pdf)  
564 [/CanMEDS-Family-Medicine-2017-ENG.pdf](https://www.cfpc.ca/uploadedFiles/Resources/Resource_Items/Health_Professionals/CanMEDS-Family-Medicine-2017-ENG.pdf). Published 2017. Accessed February 27,  
565 2020.
- 566 29. EURACT Council. THE EUROPEAN DEFINITION OF GENERAL PRACTICE/FAMILY  
567 MEDICINE. [https://www.woncaeurope.org/sites/default/files/documents/Definition](https://www.woncaeurope.org/sites/default/files/documents/Definition%20EURACTshort%20version%20revised%202011.pdf)  
568 [EURACTshort version revised 2011.pdf](https://www.woncaeurope.org/sites/default/files/documents/Definition%20EURACTshort%20version%20revised%202011.pdf). Published 2011. Accessed January 1, 2020.
- 569 30. Giugliano D, Maiorino MI, Bellastella G, Chiodini P, Esposito K. Glycemic Control,  
570 Preexisting Cardiovascular Disease, and Risk of Major Cardiovascular Events in  
571 Patients with Type 2 Diabetes Mellitus: Systematic Review With Meta-Analysis of

- 572 Cardiovascular Outcome Trials and Intensive Glucose Control Trials. *J Am Heart Assoc.*  
573 2019;8. doi:10.1161/JAHA.119.012356
- 574 31. Ettehad D, Emdin CA, Kiran A, et al. Blood pressure lowering for prevention of  
575 cardiovascular disease and death: a systematic review and meta-analysis. *Lancet.*  
576 2016;387(10022):957-967. doi:10.1016/S0140-6736(15)01225-8
- 577 32. World Health Organization and the United Nations Children's Fund (UNICEF).  
578 *Operational Framework for Primary Health Care: Transforming Vision into Action.*  
579 Geneva; 2020. <https://www.who.int/rehabilitation/CallForAction2.pdf?ua=1>.  
580  
581
